# Supplementary material
Source: PubMed Central journal article supplement (PMC7611843)
Supplement: EMS135151-supplement-Sup_Info.pdf [file EMS135151-supplement-Sup_Info.pdf]

## Supplementary Information

### Supplementary Figure 1

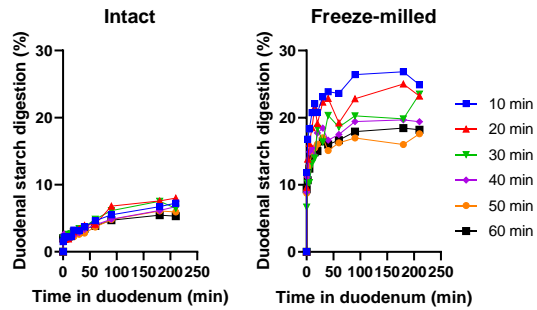

**Supplementary Figure 1. Effect of gastric residence time on duodenal digestion of chickpea porridges.**

Duodenal starch amylolysis in a static duodenal model from chickpea porridge made with intact or freeze-milled cells following different gastric residence times (10, 20, 30, 40, 50 and 60 min) in the dynamic gastric model.

Legend indicates gastric residence time for each sample and applies to all panels.

## Supplementary Figure 2

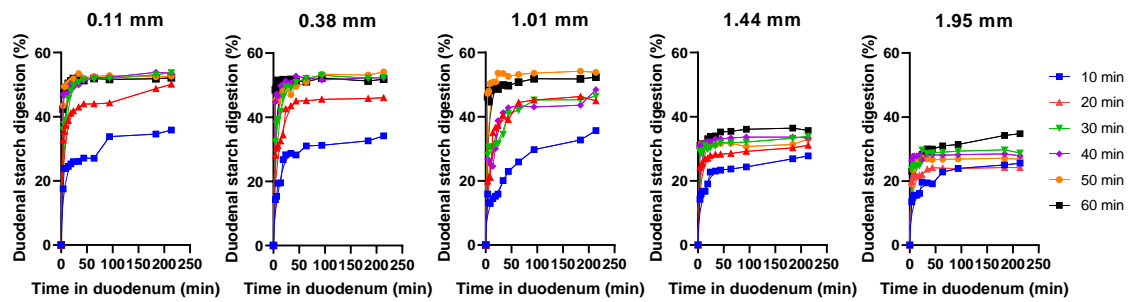

### Supplementary Figure 2. Effect of gastric residence time on duodenal digestion of durum wheat

**porridges.** Duodenal starch amylolysis in a static duodenal model from wheat porridge made from different size fractions of wheat endosperm, following different gastric residence times (10, 20, 30, 40, 50, 60 min) in the dynamic gastric model. The median sizes are indicated in each panel. Legend indicates gastric residence time for each sample and applies to all panels.
